# Supplementary material for: Ultra-small and size tunable PVP-NaGdF4:Dy nanoparticles with high biocompatibility for multimodal tumor imaging
Source: Royal Society of Chemistry journal article supplement (doi:10.1039/c6ra18780c), 2016-01-01
Supplement: c6ra18780c1.pdf [file c6ra18780c1.pdf]

## Ultra-small and Size Tunable PVP-NaGdF<sub>4</sub>:Dy Nanoparticles With High Biocompatibility for Multimodal Tumor Imaging

Min Yang,<sup>a,c</sup> Tao Wang,<sup>b,c</sup> Ying Wang,<sup>d</sup> Chunhuan Jiang,<sup>d</sup> Jinxing Chen,<sup>c</sup> Yanzhi Zhao,<sup>a,c</sup> Honglei Wang,<sup>b</sup> Yu Jiang,<sup>b</sup> Guoying Sun<sup>\*b,c</sup> and Jianhua Liu,<sup>\*e,f</sup>

- a. *School of Chemical Engineering, Changchun University of Technology, 2055 Yanan Street, Changchun, P. R. China.*
- b. *Jilin Province Key Laboratory of Carbon Fiber Development and Application, School of Chemistry and Life Science, Changchun University of Technology, 2055 Yanan Street, Changchun, P. R. China. E-mail: [Sunguoying@ccut.edu.cn](mailto:Sunguoying@ccut.edu.cn), Tel: 0431-85717368.*
- c. *Advanced Institute of Materials Science, Changchun University of Technology, 2055 Yanan Street, Changchun, P. R. China.*
- d. *State Key Laboratory of Electroanalytical Chemistry, Changchun Institute of Applied Chemistry, Chinese Academy of Sciences, 5625 Renmin Street, Changchun, P. R. China.*
- e. *Department of Radiology, Second Hospital of Jilin University, Changchun, 130041, P. R. China. [drliujh@yahoo.com](mailto:drliujh@yahoo.com).*
- f. *State Key Laboratory of Inorganic Synthesis and Preparative Chemistry, College of Chemistry, Jilin University, Changchun 130012, P. R. China.*

Table S1. Parameters for controlling the size of OA-NaGdF<sub>4</sub>:Dy.

| Temperature (°C) | Time (min) | Size (nm) |
|------------------|------------|-----------|
| 240              | 60         | 2.51      |
| 280              | 60         | 8.62      |

Table S2 The theoretical and actual molar ratio of Gd:Dy in OA-NaGdF<sub>4</sub>:Dy NPs.

| Samples                          | 2.51 nm NPs | 8.62 nm NPs |
|----------------------------------|-------------|-------------|
| Theoretical molar ratio of Gd/Dy | 0.80:0.20   | 0.80:0.20   |
| Actual molar ratio of Gd/Dy      | 0.783:0.217 | 0.774:0.226 |

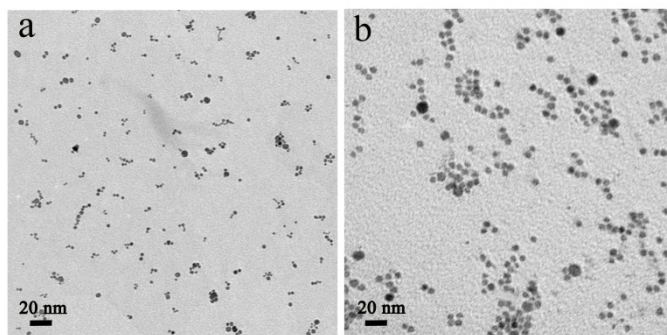

Fig. S1. TEM images of different PVP-NaGdF<sub>4</sub>:Dy NPs obtained at 240 °C (a), 280 °C (b).

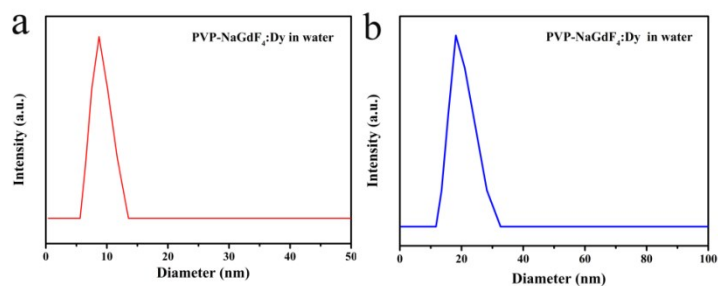

Fig. S2. Hydrodynamic size of different PVP-NaGdF<sub>4</sub>:Dy NPs obtained at 240 °C (a), 280 °C (b).

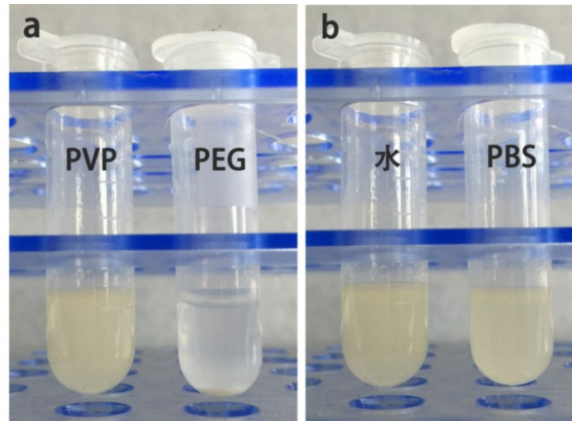

Fig. S3. The photographs of the aqueous solutions of PVP-NaGdF<sub>4</sub>:Dy NPs and PEG-NaGdF<sub>4</sub>:Dy NPs after standing 1 h (a), PVP-NaGdF<sub>4</sub>: Dy NPs in water and PBS after 30 days (b).

The preparation method of PEG-NaGdF<sub>4</sub>:Dy NPs: 5 mg NPs in 5 mL chloroform were added into 10 mL chloroform including 5 mg DSPE-PEG2000 in a 50 mL flask, the solution was stirred for 10 min at room temperature then evaporated using a rotary evaporator. The obtained mixture was maintained at 60 °C for 1 h under vacuum. Then, the product was re-dispersed in 5 mL deionized water.

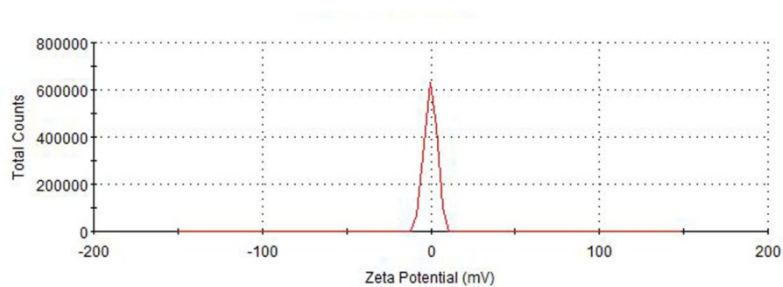

Fig. S4. Zeta Potential of PVP-NaGdF<sub>4</sub>:Dy NPs in water.

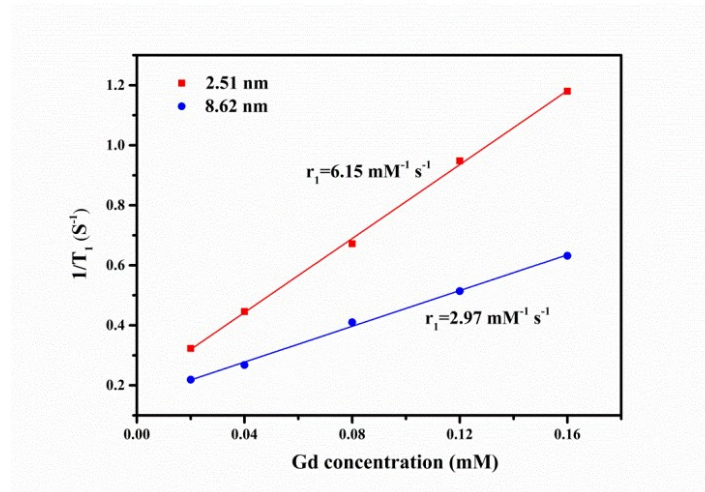

Fig. S5. The longitudinal relaxivity of different size PVP-NaGdF<sub>4</sub>:Dy NPs.

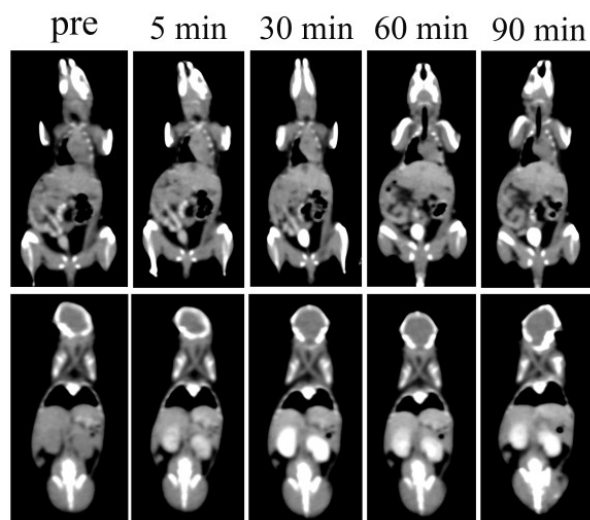

Fig. S6. CT images of the mice before and after injection of iobitridol at different time point through tail vein (100  $\mu$ L, 50 mg I mL<sup>-1</sup>).
